# Supplementary material
Source: PubMed Central journal article supplement (PMC3850785)
Supplement: NIHMS531007-supplement-1.pdf [file NIHMS531007-supplement-1.pdf]

## SUPPORTING INFORMATION

### Conjugation of Butadiene Diepoxide with Glutathione Yields DNA Adducts *In Vitro* and *In Vivo*

Cho, S-H., and Guengerich, F. P. (2012) *Chem. Res. Toxicol.* 25, 000-000

#### TABLE OF CONTENTS

**Figure S1.** Calibration curve for HPLC-ESI<sup>+</sup>-MS/MS analysis of DEB-GSH conjugate using DEB-[*glycine*-<sup>13</sup>C<sub>2</sub>, <sup>15</sup>N]-GSH conjugate as internal standard (ISTD).

**Figure S2.** Time dependence of conjugation of DEB with GSH by various GSTs (rat GST 5-5 and human GST T1-1, M1-1, A1-1, A3-3, and P1-1).

**Figure S3.** Lack of toxicity of butadiene-derived epoxides in *S. typhimurium* TA1535.

**Figure S4.** HPLC-MS chromatograms of DNA adducts formed by reaction of DEB-GSH conjugate with nucleosides.

**Figure S5.** MS/MS spectra of N<sup>3</sup>A-(OH)<sub>2</sub>butyl-GSH (A), N<sup>6</sup>dA-(OH)<sub>2</sub>butyl-GSH (B), N<sup>7</sup>G-(OH)<sub>2</sub>butyl-GSH (C), N<sup>1</sup>dG-(OH)<sub>2</sub>butyl-GSH (D), N<sup>4</sup>dC-(OH)<sub>2</sub>butyl-GSH (E), and N<sup>3</sup>dT-(OH)<sub>2</sub>butyl-GSH (F).

**Figure S6.** UV absorption spectra of N<sup>3</sup>A-(OH)<sub>2</sub>butyl-GSH (A), N<sup>6</sup>dA-(OH)<sub>2</sub>butyl-GSH (B), N<sup>7</sup>G-(OH)<sub>2</sub>butyl-GSH (C), N<sup>1</sup>dG-(OH)<sub>2</sub>butyl-GSH (D), N<sup>4</sup>dC-(OH)<sub>2</sub>butyl-GSH (E), and N<sup>3</sup>dT-(OH)<sub>2</sub>butyl-GSH (F) at acidic (0.1 M HCl), neutral, and alkaline (0.1 M NaOH) conditions.

**Figure S7.** HPLC separation of DNA adducts from the reaction of DEB-GSH conjugate with deoxyadenosine (A), deoxyguanosine (B), deoxycytidine (C), and deoxythymidine (D) followed by neutral thermal hydrolysis.

**Figure S8.** Calibration curves for HPLC-ESI<sup>+</sup>-MS/MS analysis of N<sup>3</sup>A-(OH)<sub>2</sub>butyl-GSH (A), N<sup>6</sup>dA-(OH)<sub>2</sub>butyl-GSH (B), N<sup>7</sup>G-(OH)<sub>2</sub>butyl-GSH (C), N<sup>1</sup>dG-(OH)<sub>2</sub>butyl-GSH (D), N<sup>4</sup>dC-(OH)<sub>2</sub>butyl-GSH (E), N<sup>3</sup>dT-(OH)<sub>2</sub>butyl-GSH (F) using N<sup>6</sup>dA-(OH)<sub>2</sub>butyl-[*glycine*-<sup>13</sup>C<sub>2</sub>, <sup>15</sup>N]-GSH and N<sup>7</sup>G-(OH)<sub>2</sub>butyl-[*glycine*-<sup>13</sup>C<sub>2</sub>, <sup>15</sup>N] GSH as internal standards (ISTDs).

**Figure S9.** Synthesis of [<sup>18</sup>O]-N<sup>7</sup>G-(OH)<sub>3</sub>butane from the reaction of DEB with guanine (A) and extracted ion chromatogram (B) and MS/MS spectrum of [<sup>18</sup>O]-N<sup>7</sup>G-(OH)<sub>3</sub>butane (C).

**Table S1.** NMR characterization of *S,S*-, *R,R*-, and *meso*-DEB in CDCl<sub>3</sub>

**Table S2.** Lack of mutagenicity of butadiene-derived epoxides in *S. typhimurium* TA1537

**Table S3.** NMR characterization of DNA adducts in D<sub>2</sub>O

**Figure S1.** Calibration curve for HPLC-ESI<sup>+</sup>-MS/MS analysis of DEB-GSH conjugate using DEB-[glycine-<sup>13</sup>C<sub>2</sub>, <sup>15</sup>N]-GSH conjugate as internal standard (ISTD).

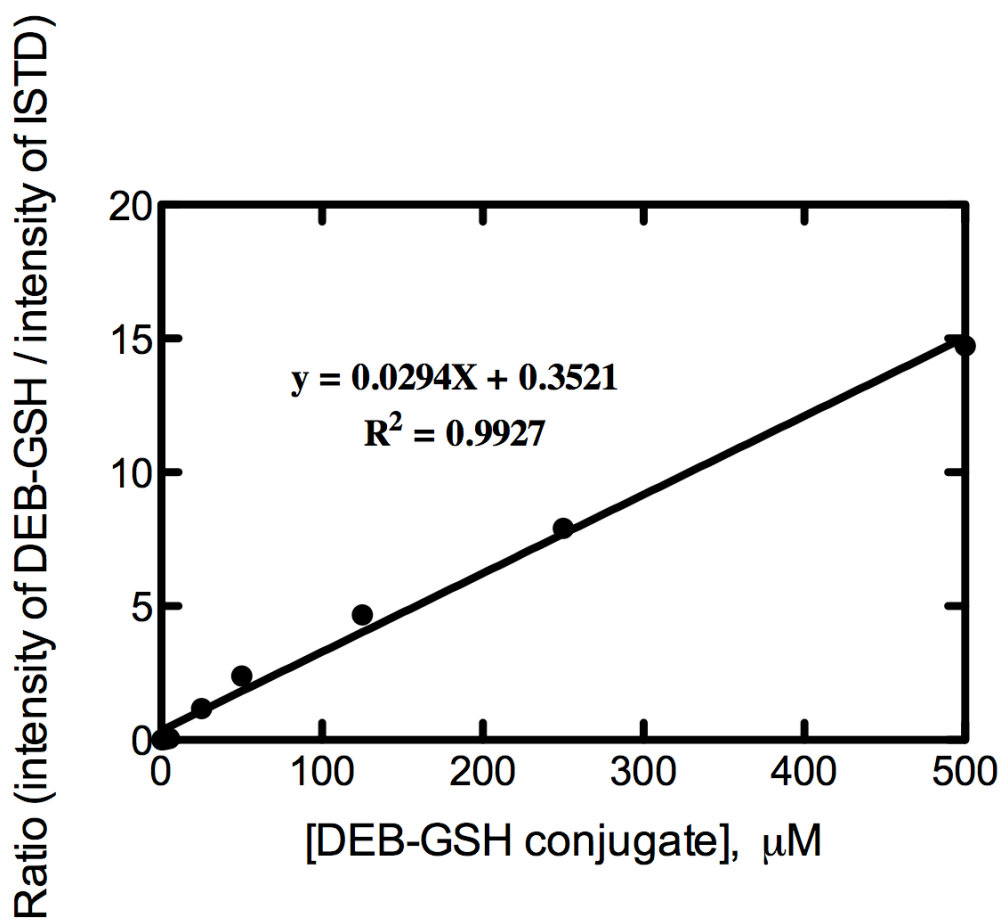

**Figure S2.** Time dependence of conjugation of DEB with GSH by various GSTs (rat GST 5-5 and human GST T1-1, M1-1, A1-1, A3-3, and P1-1). The concentrations of GSH and GSTs were 5 mM and 10  $\mu$ g/mL, respectively.

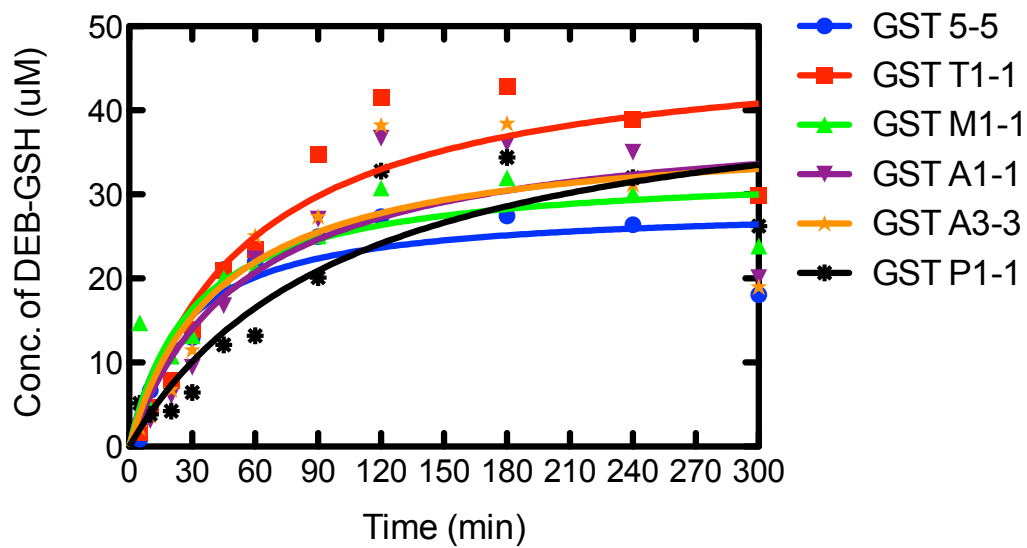

Figure S3. Lack of toxicity of butadiene-derived epoxides in *S. typhimurium* TA1535

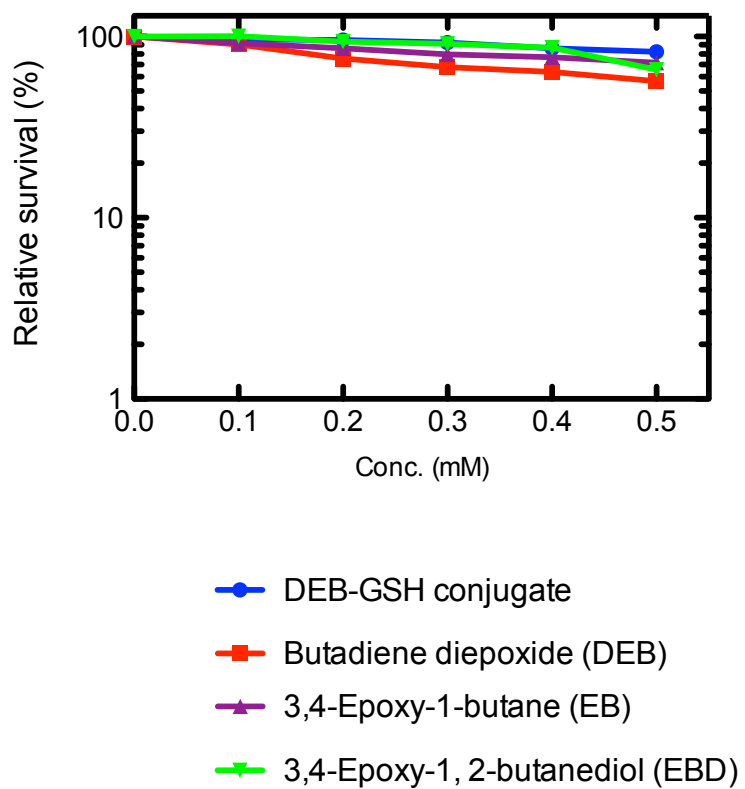

**Figure S4. HPLC-MS chromatograms of DNA adducts formed by reaction of DEB-GSH conjugate with nucleosides.**

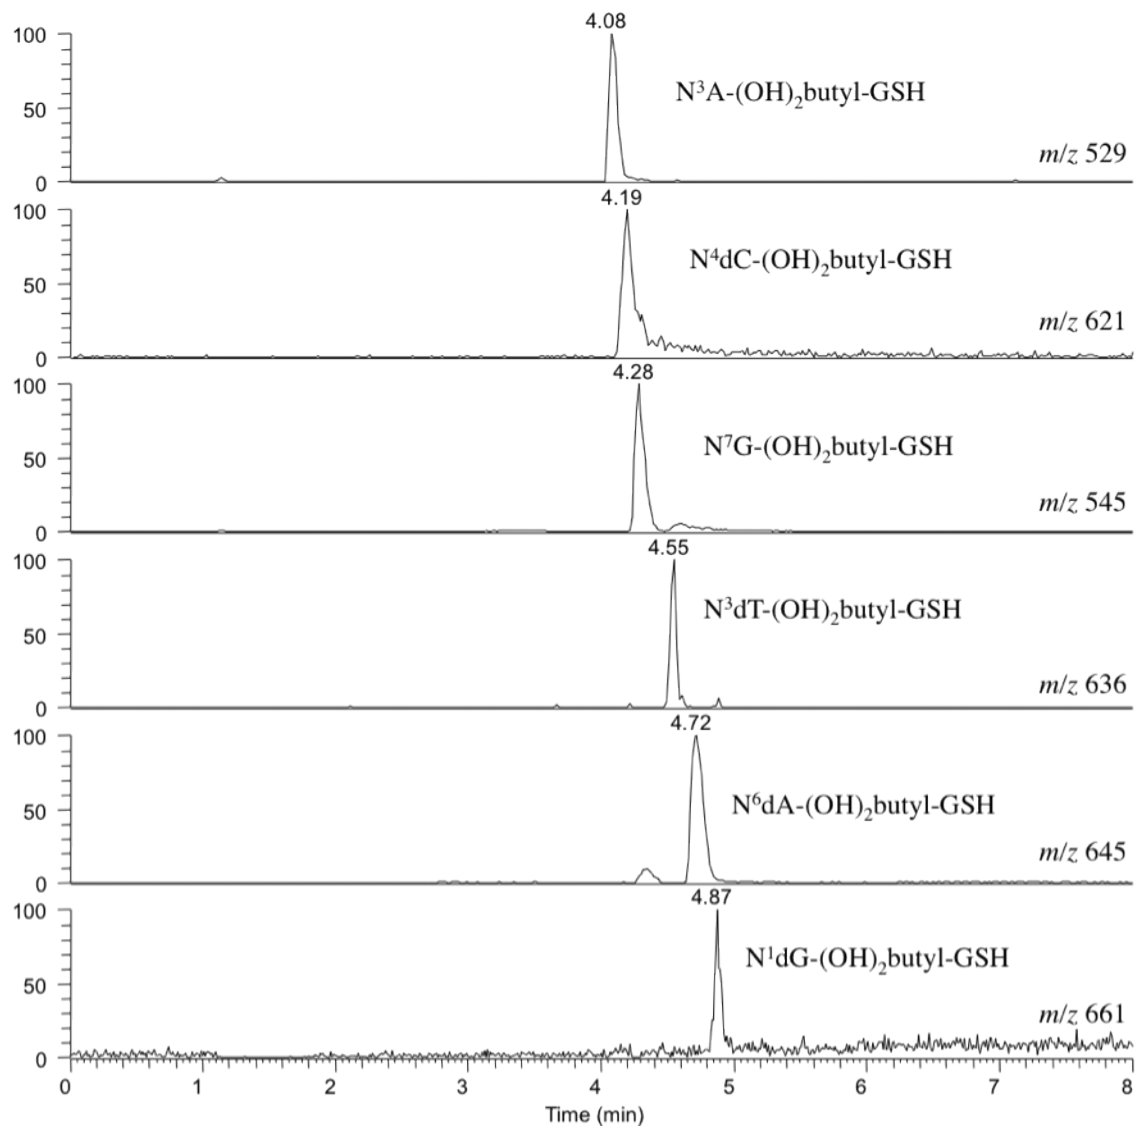

**Figure S5.** MS/MS spectra of N<sup>3</sup>A-(OH)<sub>2</sub>butyl-GSH (A), N<sup>6</sup>dA-(OH)<sub>2</sub>butyl-GSH (B), N<sup>7</sup>G-(OH)<sub>2</sub>butyl-GSH (C), N<sup>1</sup>dG-(OH)<sub>2</sub>butyl-GSH (D), N<sup>4</sup>dC-(OH)<sub>2</sub>butyl-GSH (E), and N<sup>3</sup>dT-(OH)<sub>2</sub>butyl-GSH (F).

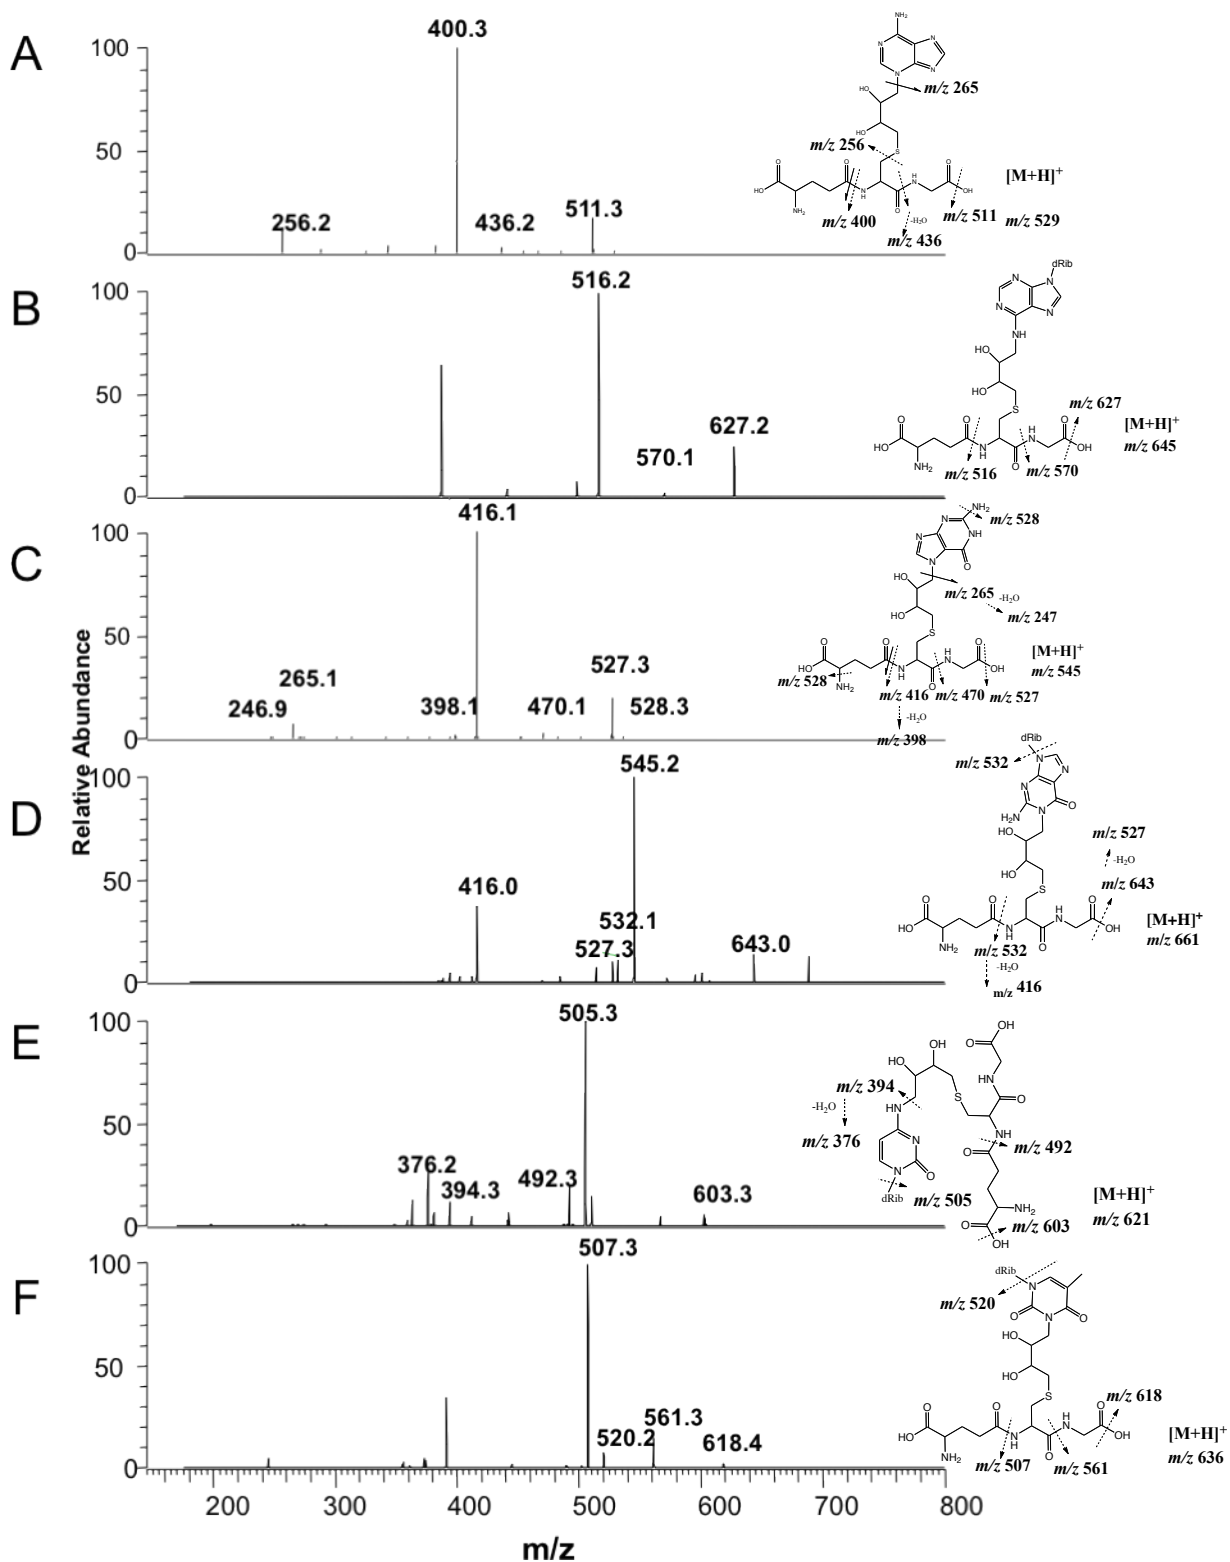

**Figure S6.** UV absorption spectra of N<sup>3</sup>A-(OH)<sub>2</sub>butyl-GSH (A), N<sup>6</sup>dA-(OH)<sub>2</sub>butyl-GSH (B), N<sup>7</sup>G-(OH)<sub>2</sub>butyl-GSH (C), N<sup>1</sup>dG-(OH)<sub>2</sub>butyl-GSH (D), N<sup>4</sup>dC-(OH)<sub>2</sub>butyl-GSH (E), and N<sup>3</sup>dT-(OH)<sub>2</sub>butyl-GSH (F) at acidic (0.1 M HCl; red line), neutral (H<sub>2</sub>O; green line), and alkaline (0.1 M NaOH; blue line) conditions.

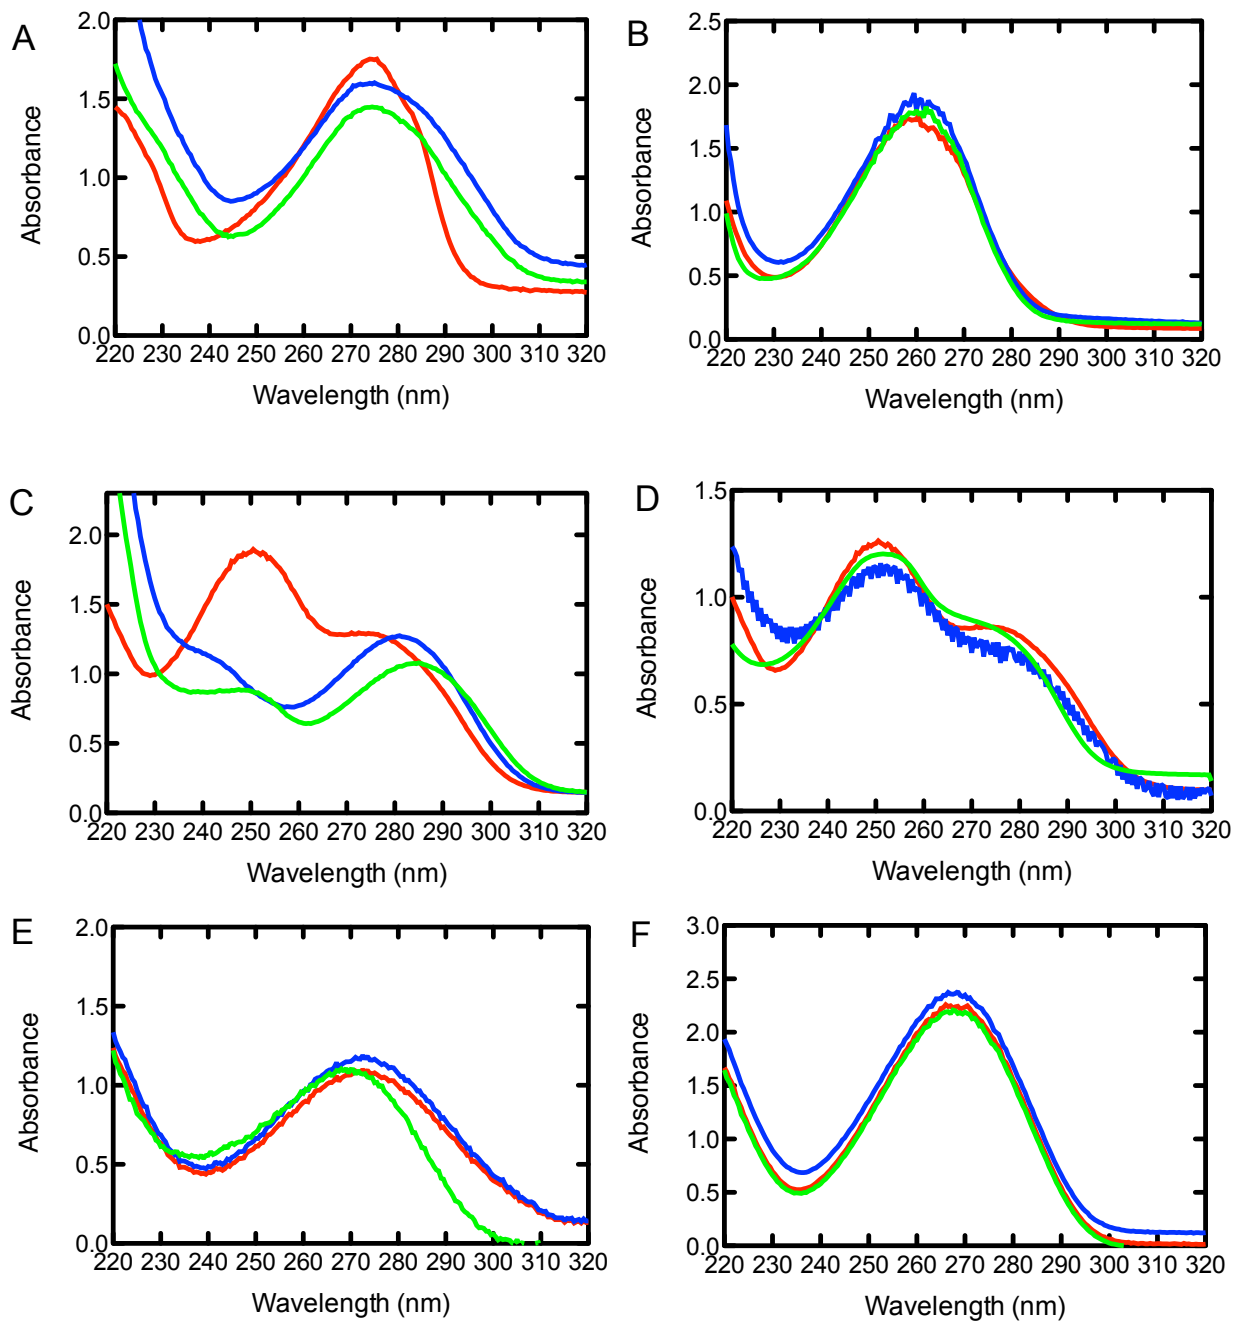



**Figure S7.** HPLC separation of DNA adducts from the reaction of DEB-GSH conjugate with deoxyadenosine (A), deoxyguanosine (B), deoxycytidine (C), and deoxythymidine (D) followed by neutral thermal hydrolysis.

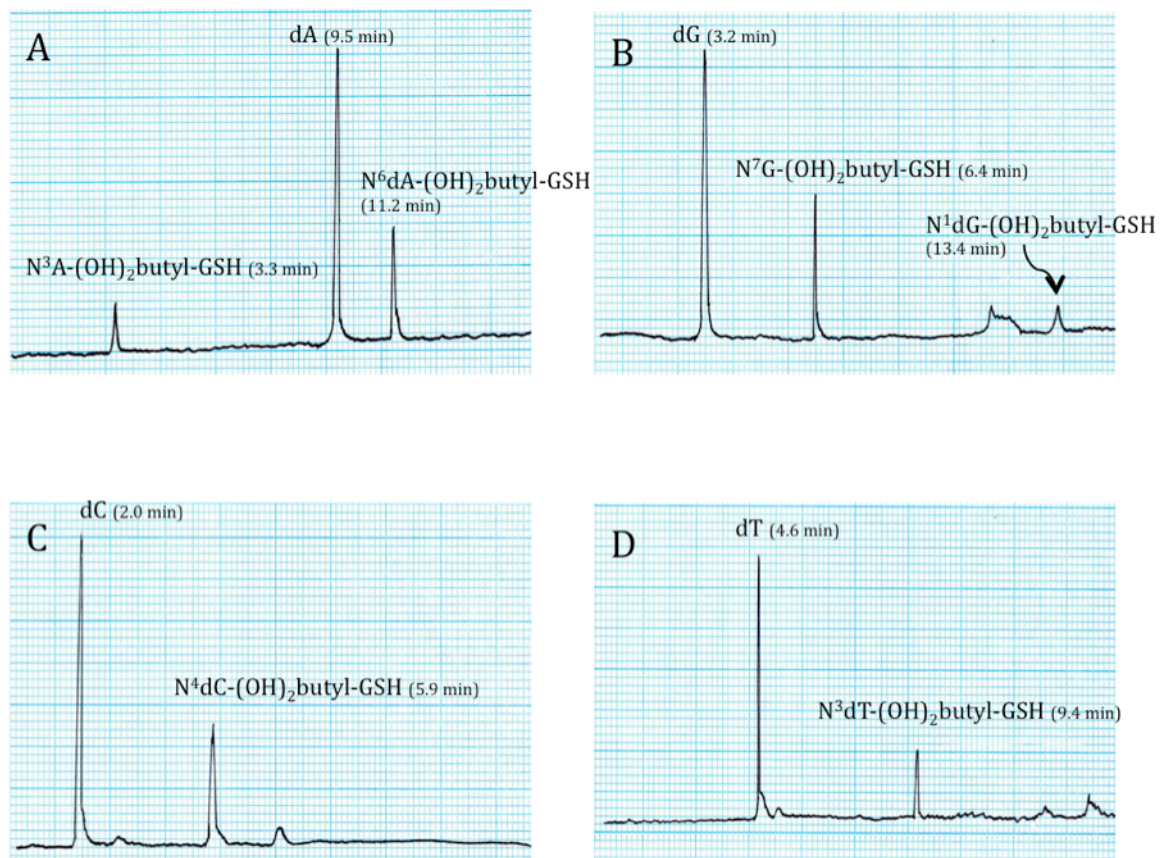

**Figure S8.** Calibration curves for HPLC-ESI<sup>+</sup>-MS/MS analysis of N<sup>3</sup>A-(OH)<sub>2</sub>butyl-GSH (A), N<sup>6</sup>dA-(OH)<sub>2</sub>butyl-GSH (B), N<sup>7</sup>G-(OH)<sub>2</sub>butyl-GSH (C), N<sup>1</sup>dG-(OH)<sub>2</sub>butyl-GSH (D), N<sup>4</sup>dC-(OH)<sub>2</sub>butyl-GSH (E), N<sup>3</sup>dT-(OH)<sub>2</sub>butyl-GSH (F) using N<sup>6</sup>dA-(OH)<sub>2</sub>butyl-[glycine-<sup>13</sup>C<sub>2</sub>, <sup>15</sup>N]-GSH and N<sup>7</sup>G-(OH)<sub>2</sub>butyl-[glycine-<sup>13</sup>C<sub>2</sub>, <sup>15</sup>N]-GSH as internal standards (ISTDs).

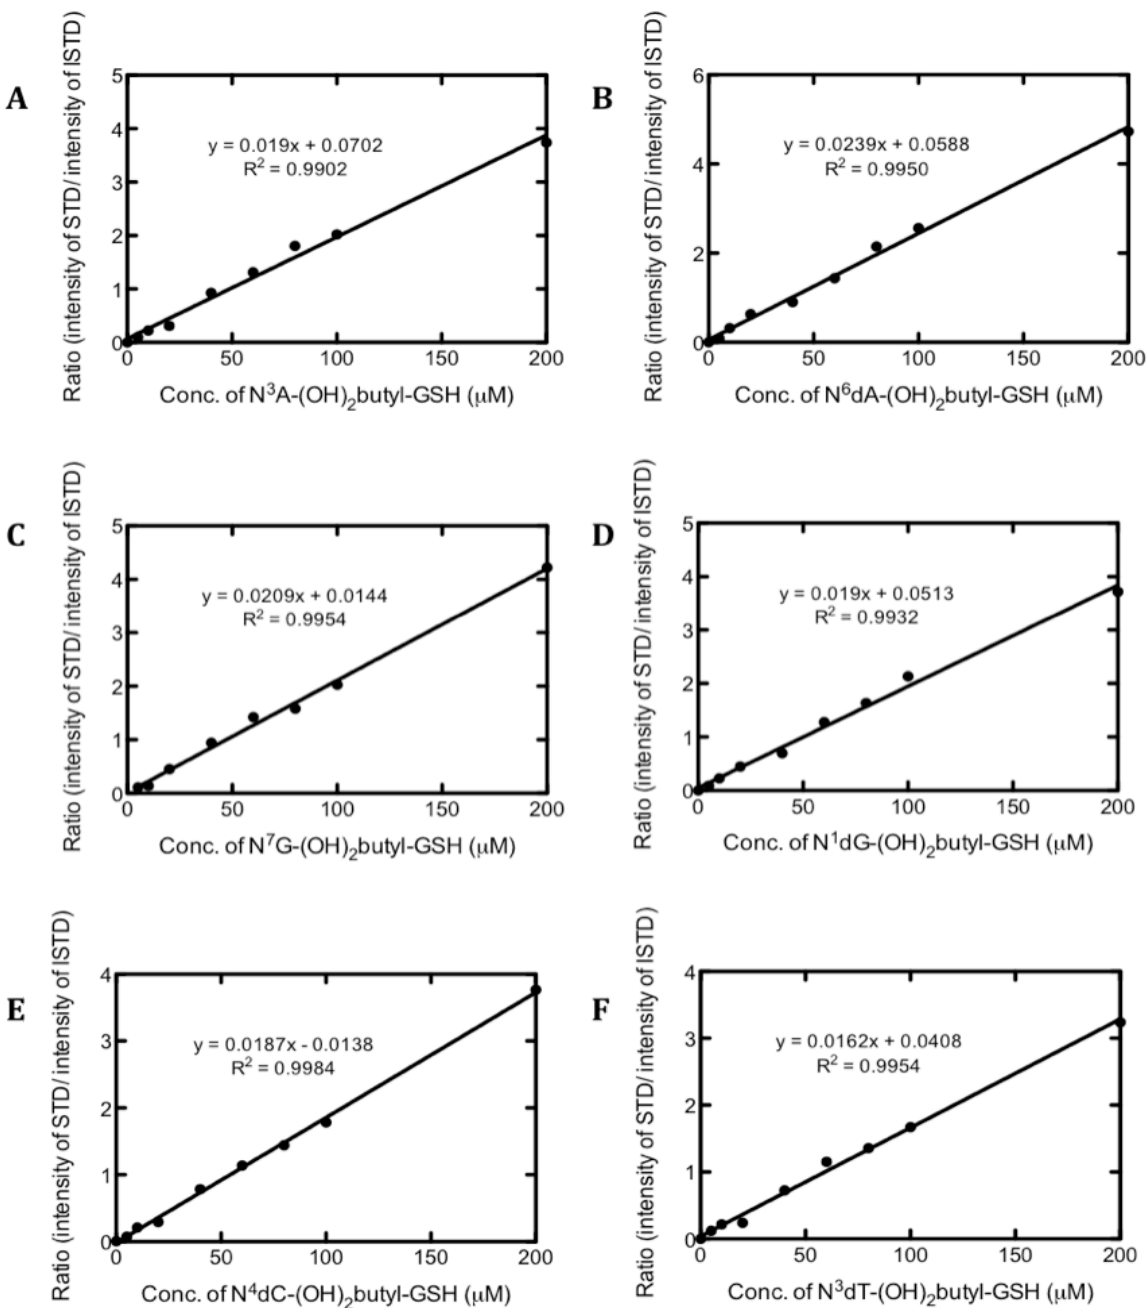

**Figure S9.** Synthesis of [ $^{18}\text{O}$ ]-N<sup>7</sup>G-(OH)<sub>3</sub>butane from the reaction of DEB with guanine (A) and extracted ion chromatogram (B) and MS/MS spectrum of [ $^{18}\text{O}$ ]-N<sup>7</sup>G-(OH)<sub>3</sub>butane (C).

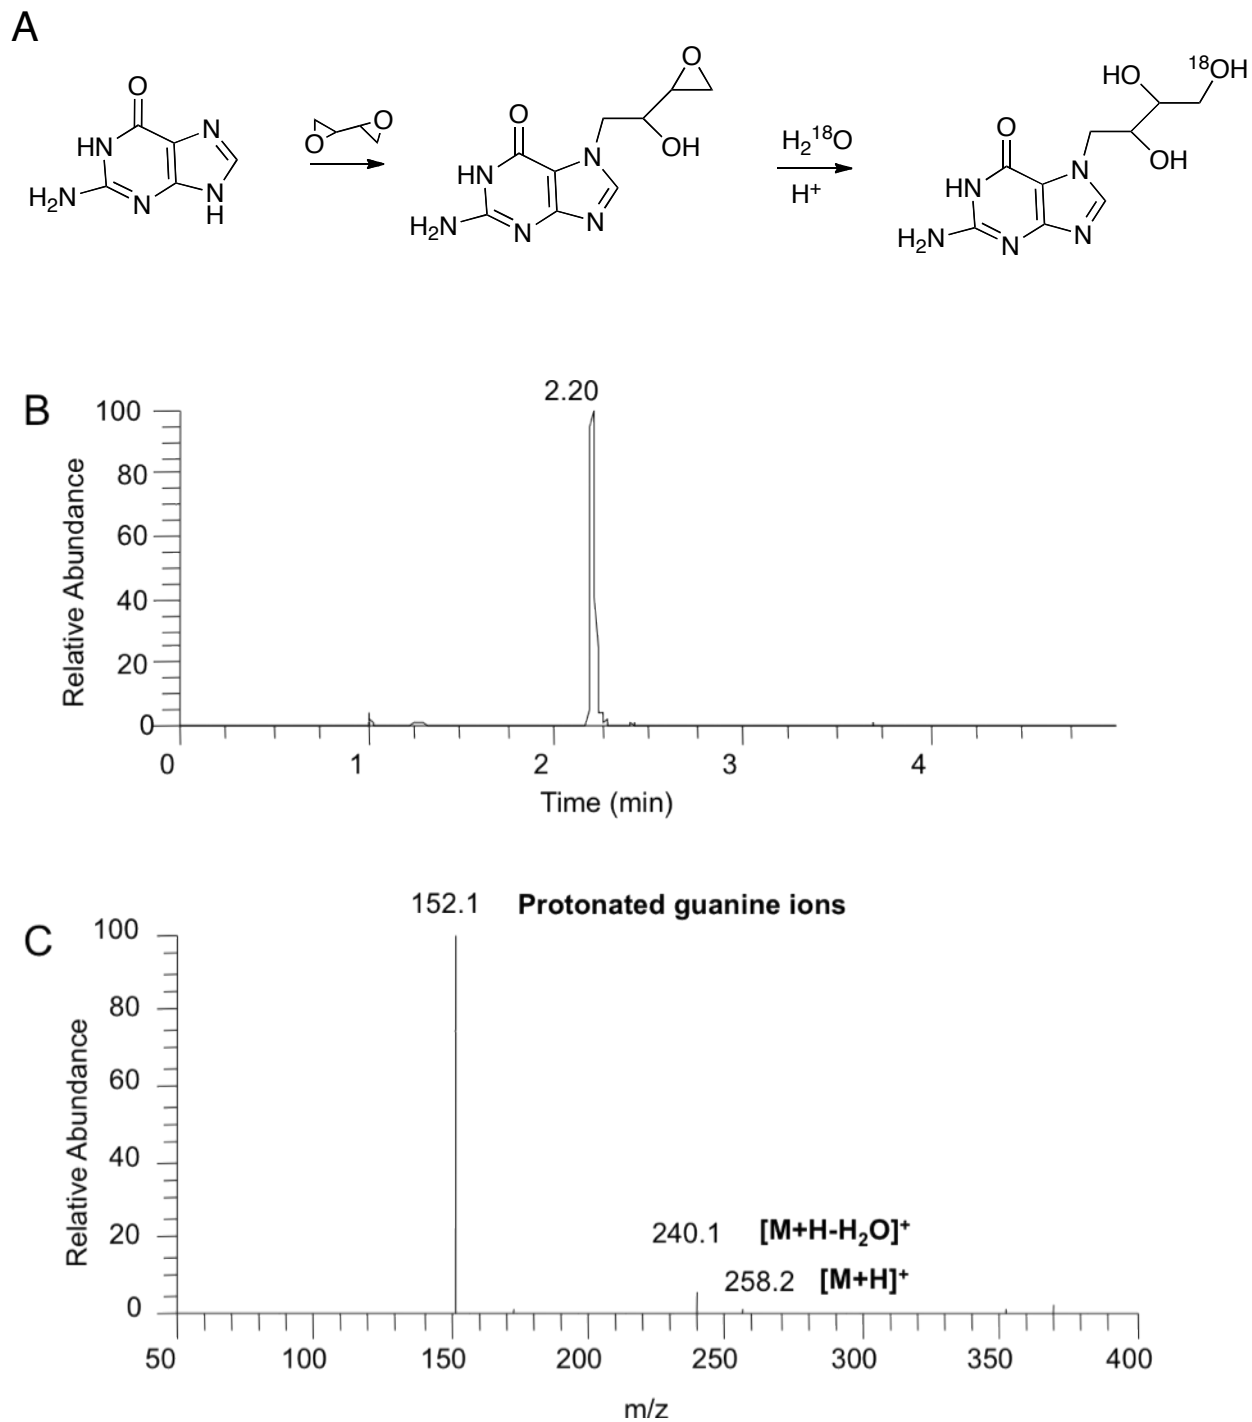

**Table S1. NMR characterization of *S,S*-, *R,R*- and *meso*-DEB in CDCl<sub>3</sub> (at room temperature)**

|                                                                                                       | Chemical shift (ppm) | Carbon chemical shift (ppm) |
|-------------------------------------------------------------------------------------------------------|----------------------|-----------------------------|
| 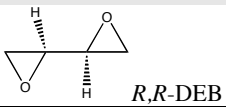<br><i>R,R</i> -DEB  | 2.71 (2H, m)         | 43.3                        |
|                                                                                                       | 2.82 (2H, m)         | 51.2                        |
|                                                                                                       | 2.88 (2H, m)         |                             |
| <br><i>S,S</i> -DEB  | 2.71 (2H, m)         | 43.3                        |
|                                                                                                       | 2.82 (2H, m)         | 51.2                        |
|                                                                                                       | 2.88 (2H, m)         |                             |
| <br><i>meso</i> -DEB | 2.68 (2H, m)         | 44.3                        |
|                                                                                                       | 2.78 (2H, m)         | 50.3                        |
|                                                                                                       | 2.93 (2H, m)         |                             |

**Table S2.** Mutagenicity of DEB-GSH conjugate and other butadiene epoxides in *S. typhimurium* TA1537.

| Conc. (mM) | TA1537 revertants/plate |     |                    |                          |
|------------|-------------------------|-----|--------------------|--------------------------|
|            | DEB-GSH conjugate       | DEB | 3,4-Epoxy-1-butane | 3,4-Epoxy-1,2-butanediol |
| 0          | 11                      | 9   | 8                  | 10                       |
| 0.1        | 8                       | 5   | 5                  | 9                        |
| 0.2        | 15                      | 5   | 6                  | 5                        |
| 0.3        | 6                       | 10  | 7                  | 7                        |
| 0.4        | 8                       | 15  | 10                 | 12                       |
| 0.5        | 7                       | 8   | 9                  | 13                       |

Spontaneous revertant control values for *S. typhimurium* TA1537: 5-20; positive control was 9-aminoacridine, which produced  $2-3 \times 10^8$  mutants/ $\mu$ mol.

**Table S3.** NMR characterization of DNA adducts in D<sub>2</sub>O (at room temperature)

| DNA adducts                                                                                                                         | chemical shift (ppm)                                                                                                                | assignment              | COSY                            |                    |
|-------------------------------------------------------------------------------------------------------------------------------------|-------------------------------------------------------------------------------------------------------------------------------------|-------------------------|---------------------------------|--------------------|
| 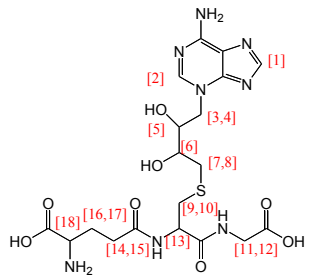<br>N <sup>3</sup> A-(OH) <sub>2</sub> butyl-GSH   | 7.99 (s, 1H)                                                                                                                        | CH [1]                  | ND                              |                    |
|                                                                                                                                     | 7.91 (s, 1H)                                                                                                                        | CH [2]                  |                                 |                    |
|                                                                                                                                     | 4.26 (m, 1H)                                                                                                                        | CH <sub>2</sub> [3]     |                                 |                    |
|                                                                                                                                     | 4.38 (dd, 1H)                                                                                                                       | CH <sub>2</sub> [4]     |                                 |                    |
|                                                                                                                                     | 4.19 (m, 1H)                                                                                                                        | CHOH [5]                |                                 |                    |
|                                                                                                                                     | 3.41 (m, 1H)                                                                                                                        | CHOH [6]                |                                 |                    |
|                                                                                                                                     | 2.62 (m, 1H)                                                                                                                        | CH <sub>2</sub> [7]     |                                 |                    |
|                                                                                                                                     | 2.81 (m, 1H)                                                                                                                        | CH <sub>2</sub> [8]     |                                 |                    |
|                                                                                                                                     | 2.84 (m, 1H)                                                                                                                        | CH <sub>2</sub> [9]     |                                 |                    |
|                                                                                                                                     | 3.00 (m, 1H)                                                                                                                        | CH <sub>2</sub> [10]    |                                 |                    |
|                                                                                                                                     | 3.74 (m, 2H)                                                                                                                        | CH <sub>2</sub> [11,12] |                                 |                    |
|                                                                                                                                     | 4.44 (m, 1H)                                                                                                                        | CH [13]                 |                                 |                    |
|                                                                                                                                     | 2.31 (m, 2H)                                                                                                                        | CH <sub>2</sub> [14,15] |                                 |                    |
|                                                                                                                                     | 1.92 (m, 1H)                                                                                                                        | CH <sub>2</sub> [16]    |                                 |                    |
|                                                                                                                                     | 2.11 (m, 1H)                                                                                                                        | CH <sub>2</sub> [17]    |                                 |                    |
|                                                                                                                                     | 3.78 (t, 1H)                                                                                                                        | CH [18]                 |                                 |                    |
|                                                                                                                                     | <br>N <sup>6</sup> dA-(OH) <sub>2</sub> butyl-GSH | 8.18 (s, 1H)            | CH [1]                          |                    |
|                                                                                                                                     |                                                                                                                                     | 8.34 (s, 1H)            | CH [2]                          |                    |
| 3.70 (m, 1H)                                                                                                                        |                                                                                                                                     | CH <sub>2</sub> [3]     | 3.82 [4]; 4.12[5]               |                    |
| 3.82 (dd, 1H)                                                                                                                       |                                                                                                                                     | CH <sub>2</sub> [4]     | 3.70 [3]; 4.12[5]               |                    |
| 4.12 (m, 1H)                                                                                                                        |                                                                                                                                     | CHOH [5]                | 3.70 [3]; 3.82 [4]; 3.64 [6]    |                    |
| 3.64 (m, 1H)                                                                                                                        |                                                                                                                                     | CHOH [6]                | 4.12[5]                         |                    |
| 2.62 (m, 1H)                                                                                                                        |                                                                                                                                     | CH <sub>2</sub> [7]     |                                 |                    |
| 2.81 (m, 1H)                                                                                                                        |                                                                                                                                     | CH <sub>2</sub> [8]     |                                 |                    |
| 2.79 (m, 1H)                                                                                                                        |                                                                                                                                     | CH <sub>2</sub> [9]     | 2.95 [10]; 4.44 [13]            |                    |
| 2.95 (m, 1H)                                                                                                                        |                                                                                                                                     | CH <sub>2</sub> [10]    | 2.79 [9]; 4.44 [13]             |                    |
| 3.74 (m, 2H)                                                                                                                        |                                                                                                                                     | CH <sub>2</sub> [11,12] |                                 |                    |
| 4.44 (m, 1H)                                                                                                                        |                                                                                                                                     | CH [13]                 | 2.79 [9]; 2.95 [10]             |                    |
| 2.31 (m, 2H)                                                                                                                        |                                                                                                                                     | CH <sub>2</sub> [14,15] | 1.92 [16]; 2.11 [17]            |                    |
| 1.92 (m, 1H)                                                                                                                        |                                                                                                                                     | CH <sub>2</sub> [16]    | 2.11 [17]; 2.31 [14,15]         |                    |
| 2.11 (m, 1H)                                                                                                                        |                                                                                                                                     | CH <sub>2</sub> [17]    | 1.92 [16]; 2.31 [14,15]         |                    |
| 3.78 (t, 1H)                                                                                                                        |                                                                                                                                     | CH [18]                 |                                 |                    |
| 6.24 (m, 1H)                                                                                                                        |                                                                                                                                     | CH [19]                 | 2.39 [21]; 2.80 [22]            |                    |
| 4.07 (m, 1H)                                                                                                                        |                                                                                                                                     | CH [20]                 | 4.52 [23]; 3.69 [24]            |                    |
| 2.39 (m, 1H)                                                                                                                        |                                                                                                                                     | CH <sub>2</sub> [21]    | 6.24 [19]; 2.80 [22]            |                    |
| 2.80 (m, 1H)                                                                                                                        |                                                                                                                                     | CH <sub>2</sub> [22]    | 6.24 [19]; 2.39 [21]; 4.52 [23] |                    |
| 4.52 (m, 1H)                                                                                                                        |                                                                                                                                     | CHOH [23]               | 4.07 [20]; 2.80 [22]            |                    |
| 3.69 (m, 1H)                                                                                                                        |                                                                                                                                     | CH <sub>2</sub> OH [24] | 4.07 [20]                       |                    |
| 3.77 (m, 1H)                                                                                                                        |                                                                                                                                     | CH <sub>2</sub> OH [25] |                                 |                    |
| <br>N <sup>7</sup> G-(OH) <sub>2</sub> butyl-GSH |                                                                                                                                     | 8.05 (s, 1H)            | CH [1]                          |                    |
|                                                                                                                                     |                                                                                                                                     | 4.24 (m, 1H)            | CH <sub>2</sub> [2]             | 4.44 [3]; 3.81 [4] |
|                                                                                                                                     | 4.44 (dd, 1H)                                                                                                                       | CH <sub>2</sub> [3]     | 4.24 [2]; 3.81 [4]              |                    |
|                                                                                                                                     | 3.81 (m, 1H)                                                                                                                        | CHOH [4]                | 4.24 [2]; 4.44 [3]; 3.39 [5]    |                    |
|                                                                                                                                     | 3.39 (m, 1H)                                                                                                                        | CHOH [5]                | 3.81 [4]                        |                    |
|                                                                                                                                     | 2.69 (m, 1H)                                                                                                                        | CH <sub>2</sub> [6]     |                                 |                    |
|                                                                                                                                     | 2.88 (m, 1H)                                                                                                                        | CH <sub>2</sub> [7]     |                                 |                    |
|                                                                                                                                     | 2.81 (m, 1H)                                                                                                                        | CH <sub>2</sub> [8]     | 2.96 [9]; 4.44 [12]             |                    |
|                                                                                                                                     | 2.96 (m, 1H)                                                                                                                        | CH <sub>2</sub> [9]     | 2.81 [8]; 4.44 [12]             |                    |
|                                                                                                                                     | 3.74 (m, 2H)                                                                                                                        | CH <sub>2</sub> [10,11] |                                 |                    |
|                                                                                                                                     | 4.44 (m, 1H)                                                                                                                        | CH [12]                 | 2.81 [8]; 2.96 [9]              |                    |
| 2.31 (m, 2H)                                                                                                                        | CH <sub>2</sub> [13,14]                                                                                                             | 1.92 [15]; 2.11 [16]    |                                 |                    |

|                                               |               |                         |                                 |
|-----------------------------------------------|---------------|-------------------------|---------------------------------|
|                                               | 1.92 (m, 1H)  | CH <sub>2</sub> [15]    | 2.11 [16]; 2.31 [13,14]         |
|                                               | 2.11 (m, 1H)  | CH <sub>2</sub> [16]    | 1.92 [15]; 2.31 [13,14]         |
|                                               | 3.78 (t, 1H)  | CH [17]                 |                                 |
|                                               | 7.85 (s, 1H)  | CH [1]                  | ND                              |
| N <sup>1</sup> dG-(OH) <sub>2</sub> butyl-GSH | 4.23 (m, 1H)  | CH <sub>2</sub> [2]     |                                 |
|                                               | 4.34 (dd, 1H) | CH <sub>2</sub> [3]     |                                 |
|                                               | 4.21 (m, 1H)  | CHOH [4]                |                                 |
|                                               | 3.66 (m, 1H)  | CHOH [5]                |                                 |
|                                               | 2.58 (m, 1H)  | CH <sub>2</sub> [6]     |                                 |
|                                               | 2.77 (m, 1H)  | CH <sub>2</sub> [7]     |                                 |
|                                               | 2.84 (m, 1H)  | CH <sub>2</sub> [8]     |                                 |
|                                               | 3.00 (m, 1H)  | CH <sub>2</sub> [9]     |                                 |
|                                               | 3.74 (m, 2H)  | CH <sub>2</sub> [10,11] |                                 |
|                                               | 4.44 (m, 1H)  | CH [12]                 |                                 |
|                                               | 2.31 (m, 2H)  | CH <sub>2</sub> [13,14] |                                 |
|                                               | 1.92 (m, 1H)  | CH <sub>2</sub> [15]    |                                 |
|                                               | 2.11 (m, 1H)  | CH <sub>2</sub> [16]    |                                 |
|                                               | 3.78 (t, 1H)  | CH [17]                 |                                 |
|                                               | 6.06 (m, 1H)  | CH [18]                 |                                 |
|                                               | 4.02 (m, 1H)  | CH [19]                 |                                 |
|                                               | 2.25 (m, 1H)  | CH <sub>2</sub> [20]    |                                 |
|                                               | 2.64 (m, 1H)  | CH <sub>2</sub> [21]    |                                 |
|                                               | 4.02 (m, 1H)  | CHOH [22]               |                                 |
|                                               | 3.70 (m, 1H)  | CH <sub>2</sub> OH [23] |                                 |
|                                               | 3.73 (m, 1H)  | CH <sub>2</sub> OH [24] |                                 |
|                                               | 7.78 (s, 1H)  | CH [1]                  |                                 |
| N <sup>4</sup> dC-(OH) <sub>2</sub> butyl-GSH | 5.76 (s, 1H)  | CH [2]                  |                                 |
|                                               | 3.53 (m, 1H)  | CH <sub>2</sub> [3]     | 3.82 [4]; 3.77 [5]              |
|                                               | 3.82 (dd, 1H) | CH <sub>2</sub> [4]     | 3.53 [3]; 3.77 [5]              |
|                                               | 3.77 (m, 1H)  | CHOH [5]                | 3.53 [3]; 3.82 [4]; 3.65 [6]    |
|                                               | 3.65 (m, 1H)  | CHOH [6]                | 3.77 [5]                        |
|                                               | 2.61 (m, 1H)  | CH <sub>2</sub> [7]     |                                 |
|                                               | 2.71 (m, 1H)  | CH <sub>2</sub> [8]     |                                 |
|                                               | 2.74 (m, 1H)  | CH <sub>2</sub> [9]     | 2.86 [10]; 4.44 [13]            |
|                                               | 2.86 (m, 1H)  | CH <sub>2</sub> [10]    | 2.74 [9]; 4.44 [13]             |
|                                               | 3.74 (m, 2H)  | CH <sub>2</sub> [11,12] |                                 |
|                                               | 4.44 (m, 1H)  | CH [13]                 | 2.74 [9]; 2.86 [10]             |
|                                               | 2.31 (m, 2H)  | CH <sub>2</sub> [14,15] | 1.92 [16]; 2.11 [17]            |
|                                               | 1.92 (m, 1H)  | CH <sub>2</sub> [16]    | 2.11 [17]; 2.31 [14,15]         |
|                                               | 2.11 (m, 1H)  | CH <sub>2</sub> [17]    | 1.92 [16]; 2.31 [14,15]         |
|                                               | 3.78 (t, 1H)  | CH [18]                 |                                 |
|                                               | 6.25 (m, 1H)  | CH [19]                 | 2.16 [21]; 2.38 [22]            |
|                                               | 4.06 (m, 1H)  | CH [20]                 | 4.50 [23]; 3.90 [24]            |
|                                               | 2.16 (m, 1H)  | CH <sub>2</sub> [21]    | 6.25 [19]; 2.38 [22]            |
|                                               | 2.38 (m, 1H)  | CH <sub>2</sub> [22]    | 6.25 [19]; 2.16 [21]; 4.50 [23] |
|                                               | 4.50 (m, 1H)  | CHOH [23]               | 4.06 [20]; 2.38 [22]            |
|                                               | 3.90 (m, 1H)  | CH <sub>2</sub> OH [24] | 4.06 [20]                       |
|                                               | 4.04 (m, 1H)  | CH <sub>2</sub> OH [25] |                                 |
|                                               | 7.54 (s, 1H)  | CH [1]                  |                                 |
| N <sup>3</sup> dT-(OH) <sub>2</sub> butyl-GSH | 1.90 (s, 3H)  | CH <sub>3</sub> [2]     |                                 |
|                                               | 3.79 (m, 1H)  | CH <sub>2</sub> [3]     | 3.88 [4]; 3.92 [5]              |
|                                               | 3.88 (dd, 1H) | CH <sub>2</sub> [4]     | 3.79 [3]; 3.92 [5]              |
|                                               | 3.92 (m, 1H)  | CHOH [5]                | 3.79 [3]; 3.88 [4]; 3.72 [6]    |

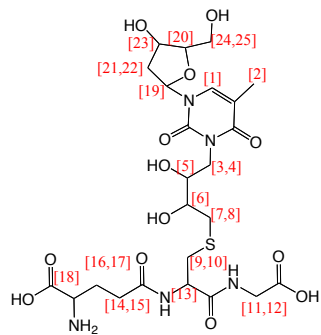

|              |                         |                                 |
|--------------|-------------------------|---------------------------------|
| 3.72 (m, 1H) | CHOH [6]                | 3.92 [5]                        |
| 2.68 (m, 1H) | CH <sub>2</sub> [7]     |                                 |
| 2.78 (m, 1H) | CH <sub>2</sub> [8]     |                                 |
| 2.79 (m, 1H) | CH <sub>2</sub> [9]     | 2.92 [10]; 4.44 [13]            |
| 2.92 (m, 1H) | CH <sub>2</sub> [10]    | 2.79 [9]; 4.44 [13]             |
| 3.74 (m, 2H) | CH <sub>2</sub> [11,12] |                                 |
| 4.44 (m, 1H) | CH [13]                 | 2.79 [9]; 2.92 [10]             |
| 2.31 (m, 2H) | CH <sub>2</sub> [14,15] | 1.92 [16]; 2.11 [17]            |
| 1.92 (m, 1H) | CH <sub>2</sub> [16]    | 2.11 [17]; 2.31 [14,15]         |
| 2.11 (m, 1H) | CH <sub>2</sub> [17]    | 1.92 [16]; 2.31 [14,15]         |
| 3.78 (t, 1H) | CH [18]                 |                                 |
| 6.30 (m, 1H) | CH [19]                 | 2.26 [21]; 2.45 [22]            |
| 3.95 (m, 1H) | CH [20]                 | 4.44 [23]; 3.79 [24]            |
| 2.26 (m, 1H) | CH <sub>2</sub> [21]    | 6.30 [19]; 2.45 [22]            |
| 2.45 (m, 1H) | CH <sub>2</sub> [22]    | 6.30 [19]; 2.26 [21]; 4.44 [23] |
| 4.44 (m, 1H) | CHOH [23]               | 3.95 [20]; 2.45 [22]            |
| 3.79 (m, 1H) | CH <sub>2</sub> OH [24] | 3.95 [20]                       |
| 3.80 (m, 1H) | CH <sub>2</sub> OH [25] |                                 |

ND: not determined
